# Supplementary material for: Endophilin B2 promotes inner mitochondrial membrane degradation by forming heterodimers with Endophilin B1 during mitophagy
Source: PubMed Central journal article supplement (PMC4845016; doi:10.1038/srep25153), 2016-04-26
Supplement: srep25153-s1.pdf [file srep25153-s1.pdf]

# Supplemental information

## **Endophilin B2 promotes inner mitochondrial membrane degradation by forming heterodimers with Endophilin B1 during mitophagy**

Yi-Han Wang<sup>1,2,4</sup>, Jiu-Qiang Wang<sup>2,4</sup>, Qiaochu Wang<sup>2,4</sup>, Yun Wang<sup>2</sup>, Caixia Guo<sup>3</sup>, Quan Chen<sup>2</sup>, Tuanyao Chai<sup>\*1</sup>, Tie-Shan Tang<sup>\*2</sup>

<sup>1</sup>University of Chinese Academy of Sciences, Beijing 100049, China

<sup>2</sup>State Key Laboratory of Membrane Biology, Institute of Zoology, Chinese Academy of Sciences, Beijing 100101, China

<sup>3</sup>Key Laboratory of Genomic and Precision Medicine, China Gastrointestinal Cancer Research Center, Beijing Institute of Genomics, Chinese Academy of Sciences, Beijing 100101, China

<sup>4</sup>Equal contribution.

\*Correspondence: [tangtsh@ioz.ac.cn](mailto:tangtsh@ioz.ac.cn); [tychai@ucas.ac.cn](mailto:tychai@ucas.ac.cn)

## Figure S1

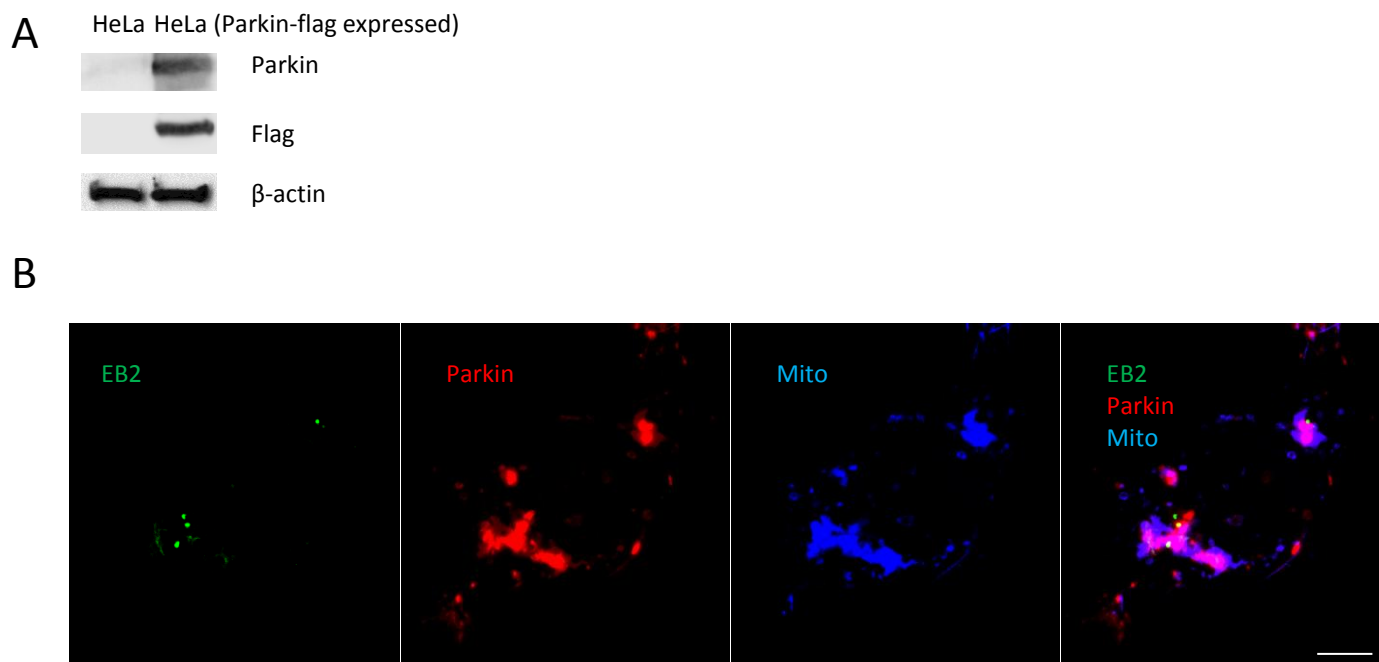

**Parkin expression and translocation to damaged mitochondria during CCCP treatment were confirmed in HeLa (Parkin-flag) cells.**

(A) Parkin expression in HeLa (Parkin-flag) was performed by western blot using indicated antibodies.

(B) HeLa (Parkin-flag) cell expressing EB2-YFP (green) and Mito-BFP (blue) was treated with CCCP (20  $\mu$ M) for 9 hours and then subjected to immunostain with flag antibodies (red). Scale bar, 5  $\mu$ m.

Figure S2

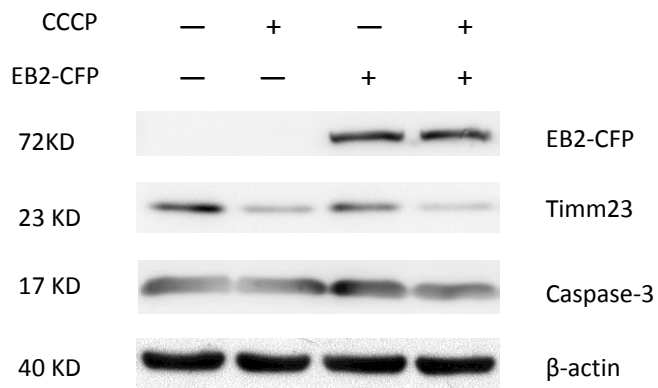

**CCCP treatment and EB2 overexpression did not induce caspase-3 cleavage.** HeLa (Parkin-flag expressed) expressing EB2-CFP or not were treated with CCCP for 24 h or not as indicated and then subjected to immunoblot analysis by using indicated antibodies.

## **Supplemental Methods**

### **Immunoblot analyses**

Cell lysates were prepared in SDS loading buffer. The following primary antibodies were used: purified mouse anti-Timm23 antibodies (1:1000; BD Biosciences, 611223) , anti-caspase-3, p17 specific rabbit polyclonal antibodies (1:1000; proteintech, 25546-1-AP), anti-Parkin mouse monoclonal antibodies (1:1000; EMD Millipore, 05-882), anti-GFP rabbit polyclonal antibodies (1:5000; Abmart), anti- $\beta$ -actin mouse monoclonal antibodies (1:100000; Abmart, 224175). The following secondary antibodies were used: Horseradish peroxidase (HRP)-conjugated Affinipure goat anti-rabbit (1:10000; Jackson) and HRP-conjugated Affinipure goat anti-mouse (1:10000; Jackson).

### **Immunofluorescence microscopy**

HeLa (Parkin-flag expressed) cells expressing EB2-YFP and mito-BFP were treated with CCCP for 9h and then fixed in 4% PBS-paraformaldehyde, permeabilized with 0.25% triton x 100 for 10 min, incubated with anti-flag mouse monoclonal antibody (1:5000; Beyotime) against Parkin-flag followed by secondary antibodies conjugated with Alexa 546. Images were obtained from confocal microscope of NiKon N-SIM.
